# Supplementary material
Source: HighWire-hosted journal article supplement (https://lupus.bmj.com/content/4/1/e000187)
Supplement: inline-supplementary-material-1 [file inline-supplementary-material-1.xls]

## Sheet: dlbcl.allsites.lupus.assoc.logi
SNP	CHR	LOC	GROUP	CATEGORY	INFO	NUM_CONTROL	NUM_CASE	REFERENCE_ALLELE	EFFECT_ALLELE	EFFECT_ALLELE_FREQ_CONTROL	EFFECT_ALLELE_FREQ_CASE	OR	CI	P	Phet	I2	META_RE_OR	META_RE_OR_P	META_RE_CI	META_RE_Q	META_RE_I2
rs17849502	chr1	183532580	NCI	i	0.67848	6220	2660	G	T	0.0469	0.051	1.06	(0.88-1.28)	0.51913
rs17849502	chr1	183532580	GELA	i	0.70923	524	549	G	T	0.05	0.0484	0.98	(0.61-1.57)	0.92105
rs17849502	chr1	183532580	MAYO_DLBCL	i	0.73925	172	392	G	T	0.0499	0.0468	0.68	(0.30-1.52)	0.34509
rs17849502	chr1	183532580	SF	i	0.62067	747	253	G	T	0.0546	0.0638	1.32	(0.75-2.33)	0.3408
rs17849502	chr1	183532580	GELA+MAYO_DLBCL+NCI+SF			7663	3854					1.0518	(0.8941-1.2373)	0.542476	0.603602	0	1.05	0.5547	(0.892 – 1.236)	1.82, p = 0.611	0
rs1801274	chr1	161479745	NCI	g	1	6221	2661	A	G	0.499	0.4927	1	(0.93-1.06)	0.8919
rs1801274	chr1	161479745	GELA	g	1	525	549	A	G	0.46	0.469	1.1	(0.92-1.30)	0.30209
rs1801274	chr1	161479745	MAYO_DLBCL	g	1	172	393	A	G	0.4302	0.5	1.27	(0.96-1.68)	0.090787
rs1801274	chr1	161479745	SF	g	1	748	254	A	G	0.482	0.4429	0.86	(0.70-1.05)	0.13099
rs1801274	chr1	161479745	GELA+MAYO_DLBCL+NCI+SF			7666	3857					1.0041	(0.9474-1.0642)	0.889824	0.101961	51.6677	1.023	0.693046	(0.913 – 1.147)	6.01, p = 0.111	0.501
rs2205960	chr1	173191475	NCI	i	0.97521	6220	2661	G	T	0.2315	0.2178	0.94	(0.86-1.02)	0.11887
rs2205960	chr1	173191475	GELA	g	1	525	549	G	T	0.2257	0.2131	0.96	(0.78-1.19)	0.72592
rs2205960	chr1	173191475	MAYO_DLBCL	g	1	172	393	G	T	0.2471	0.2036	0.84	(0.61-1.16)	0.293
rs2205960	chr1	173191475	SF	g	1	748	254	G	T	0.2226	0.2008	0.87	(0.68-1.12)	0.28481
rs2205960	chr1	173191475	GELA+MAYO_DLBCL+NCI+SF			7665	3857					0.9296	(0.8659-0.9980)	0.044024	0.862061	0	0.931	0.0548993	(0.865 – 1.002)	0.81, p = 0.848	0
rs2476601	chr1	114377568	NCI	i	0.89257	6220	2660	A	G	0.9139	0.9149	0.97	(0.86-1.11)	0.67762
rs2476601	chr1	114377568	GELA	i	0.91875	524	548	A	G	0.9026	0.9067	1	(0.74-1.35)	0.98947
rs2476601	chr1	114377568	MAYO_DLBCL	g	1	172	393	A	G	0.8866	0.9033	1.02	(0.66-1.56)	0.93705
rs2476601	chr1	114377568	SF	g	1	748	254	A	G	0.9057	0.8858	0.81	(0.58-1.13)	0.20453
rs2476601	chr1	114377568	GELA+MAYO_DLBCL+NCI+SF			7664	3855					0.9601	(0.8624-1.0690)	0.457709	0.743736	0	0.959	0.441704	(0.861 – 1.067)	1.17, p = 0.760	0
rs3024505	chr1	206939904	NCI	g	1	6221	2661	G	A	0.1607	0.183	1.17	(1.07-1.28)	0.00068911
rs3024505	chr1	206939904	GELA	g	1	525	549	G	A	0.1495	0.1539	1.04	(0.82-1.33)	0.7339
rs3024505	chr1	206939904	MAYO_DLBCL	g	1	172	393	G	A	0.1337	0.1959	1.57	(1.11-2.24)	0.011532
rs3024505	chr1	206939904	SF	g	1	748	254	G	A	0.1624	0.1339	0.8	(0.60-1.06)	0.11733
rs3024505	chr1	206939904	GELA+MAYO_DLBCL+NCI+SF			7666	3857					1.1385	(1.0517-1.2325)	0.00134823	0.016828	70.63	1.102	0.35232	(0.898 – 1.353)	10.02, p = 0.018	0.701
rs13385731	chr2	33701890	NCI	g	1	6221	2661	T	C	0.0691	0.0648	0.95	(0.83-1.09)	0.48982
rs13385731	chr2	33701890	GELA	g	1	525	549	T	C	0.0562	0.0647	1.23	(0.86-1.75)	0.2554
rs13385731	chr2	33701890	MAYO_DLBCL	g	1	172	393	T	C	0.0843	0.0674	0.9	(0.55-1.47)	0.66875
rs13385731	chr2	33701890	SF	i	0.8538	747	253	T	C	0.0628	0.0577	0.91	(0.58-1.43)	0.67207
rs13385731	chr2	33701890	GELA+MAYO_DLBCL+NCI+SF			7665	3856					0.974	(0.8653-1.0964)	0.663092	0.584524	0	0.972	0.637811	(0.863 – 1.094)	1.97, p = 0.578	0
rs1990760	chr2	163124051	NCI	g	1	6221	2661	C	T	0.6058	0.5874	0.96	(0.89-1.02)	0.19552
rs1990760	chr2	163124051	GELA	g	1	525	549	C	T	0.5952	0.5883	0.99	(0.83-1.18)	0.92457
rs1990760	chr2	163124051	MAYO_DLBCL	g	1	172	393	C	T	0.5785	0.5878	0.97	(0.74-1.27)	0.83278
rs1990760	chr2	163124051	SF	g	1	748	254	C	T	0.5902	0.5807	0.96	(0.78-1.18)	0.68686
rs1990760	chr2	163124051	GELA+MAYO_DLBCL+NCI+SF			7666	3857					0.9608	(0.9054-1.0196)	0.187009	0.984944	0	0.964	0.223359	(0.908 – 1.023)	0.11, p = 0.991	0
rs7582694	chr2	191970120	NCI	g	1	6221	2661	C	G	0.7744	0.7792	1.04	(0.96-1.12)	0.37187
rs7582694	chr2	191970120	GELA	i	0.9841	524	548	C	G	0.7629	0.8013	1.29	(1.05-1.59)	0.015228
rs7582694	chr2	191970120	MAYO_DLBCL	i	0.98861	171	393	C	G	0.7918	0.7707	0.94	(0.68-1.30)	0.69341
rs7582694	chr2	191970120	SF	i	0.98242	747	253	C	G	0.7674	0.7995	1.22	(0.95-1.57)	0.11857
rs7582694	chr2	191970120	GELA+MAYO_DLBCL+NCI+SF			7663	3855					1.0717	(0.9995-1.1491)	0.0515049	0.139299	45.345	1.11	0.108049	(0.977 – 1.260)	5.30, p = 0.151	0.434
rs6445975	chr3	58370177	NCI	g	1	6221	2661	G	T	0.7199	0.7244	1.01	(0.93-1.09)	0.85684
rs6445975	chr3	58370177	GELA	g	1	525	549	G	T	0.741	0.7468	1.01	(0.82-1.23)	0.95939
rs6445975	chr3	58370177	MAYO_DLBCL	g	1	172	393	G	T	0.6977	0.7252	1.08	(0.80-1.47)	0.60664
rs6445975	chr3	58370177	SF	g	1	748	254	G	T	0.7213	0.7185	0.99	(0.79-1.23)	0.90134
rs6445975	chr3	58370177	GELA+MAYO_DLBCL+NCI+SF			7666	3857					1.0083	(0.9444-1.0765)	0.804174	0.968453	0	1.011	0.743077	(0.945 – 1.083)	0.22, p = 0.975	0
rs10516487	chr4	102751076	NCI	i	0.99861	6221	2661	G	A	0.3066	0.2982	0.97	(0.90-1.05)	0.4524
rs10516487	chr4	102751076	GELA	i	0.99629	525	549	G	A	0.3123	0.2996	0.94	(0.78-1.14)	0.55973
rs10516487	chr4	102751076	MAYO_DLBCL	g	1	172	393	G	A	0.311	0.2952	0.91	(0.68-1.22)	0.53221
rs10516487	chr4	102751076	SF	g	1	748	254	G	A	0.3061	0.3071	1	(0.81-1.25)	0.96498
rs10516487	chr4	102751076	GELA+MAYO_DLBCL+NCI+SF			7666	3857					0.9691	(0.9093-1.0327)	0.332978	0.948729	0	0.966	0.303231	(0.904 – 1.032)	0.35, p = 0.951	0
rs907715	chr4	123535053	NCI	i	0.99469	6220	2661	C	T	0.3405	0.3282	0.94	(0.87-1.01)	0.073391
rs907715	chr4	123535053	GELA	i	0.98756	524	549	C	T	0.3322	0.3488	1.1	(0.91-1.32)	0.31035
rs907715	chr4	123535053	MAYO_DLBCL	i	0.9947	172	392	C	T	0.3515	0.338	0.93	(0.70-1.23)	0.60067
rs907715	chr4	123535053	SF	i	0.99171	748	254	C	T	0.3471	0.3599	1.05	(0.85-1.30)	0.6387
rs907715	chr4	123535053	GELA+MAYO_DLBCL+NCI+SF			7664	3856					0.9631	(0.9057-1.0241)	0.230148	0.349826	8.65788	0.968	0.339145	(0.906 – 1.034)	3.05, p = 0.384	0.016
rs10036748	chr5	150458146	NCI	g	1	6221	2661	C	T	0.2539	0.2638	1.03	(0.96-1.12)	0.38056
rs10036748	chr5	150458146	GELA	g	1	525	549	C	T	0.2667	0.2559	0.92	(0.75-1.11)	0.37133
rs10036748	chr5	150458146	MAYO_DLBCL	g	1	172	393	C	T	0.2355	0.2697	1.17	(0.86-1.59)	0.32471
rs10036748	chr5	150458146	SF	i	0.98318	747	253	C	T	0.2725	0.2621	0.95	(0.76-1.19)	0.65399
rs10036748	chr5	150458146	GELA+MAYO_DLBCL+NCI+SF			7665	3856					1.0184	(0.9530-1.0882)	0.590349	0.484488	0	1.015	0.652213	(0.950 – 1.085)	2.26, p = 0.520	0
rs57095329	chr5	159894847	NCI	i	0.91916	6220	2660	A	G	0.0258	0.0248	0.98	(0.79-1.23)	0.88976
rs57095329	chr5	159894847	GELA	i	0.87326	525	549	A	G	0.0234	0.0333	1.57	(0.89-2.77)	0.11809
rs57095329	chr5	159894847	MAYO_DLBCL	i	0.89702	172	392	A	G	0.035	0.0198	0.6	(0.24-1.48)	0.26815
rs57095329	chr5	159894847	SF	i	0.84155	748	253	A	G	0.0364	0.0286	0.76	(0.42-1.37)	0.36447
rs57095329	chr5	159894847	GELA+MAYO_DLBCL+NCI+SF			7665	3854					0.9883	(0.8164-1.1966)	0.904313	0.212655	33.2727	0.98	0.89609	( 0.726 – 1.323)	4.47, p = 0.215	0.329
rs1270942	chr6	31918860	NCI	g	1	6221	2661	A	G	0.1029	0.1238	1.24	(1.10-1.41)	0.00078535
rs1270942	chr6	31918860	GELA	g	1	525	549	A	G	0.0962	0.1011	1.13	(0.85-1.51)	0.39492
rs1270942	chr6	31918860	MAYO_DLBCL	g	1	172	393	A	G	0.1337	0.112	0.83	(0.56-1.22)	0.33388
rs1270942	chr6	31918860	SF	g	1	748	254	A	G	0.0996	0.126	1.32	(0.95-1.82)	0.093107
rs1270942	chr6	31918860	GELA+MAYO_DLBCL+NCI+SF			7666	3857					1.1992	(1.0791-1.3327)	0.000744278	0.225	31.2133	1.171	0.0361721	(1.010 - 1.357)	4.21, p = 0.240	0.287
rs548234	chr6	106568034	NCI	i	0.98762	6220	2661	C	T	0.6746	0.6895	1.06	(0.99-1.14)	0.11664
rs548234	chr6	106568034	GELA	g	1	525	549	C	T	0.6714	0.6995	1.14	(0.94-1.37)	0.1809
rs548234	chr6	106568034	MAYO_DLBCL	g	1	172	393	C	T	0.7238	0.673	0.81	(0.61-1.08)	0.15361
rs548234	chr6	106568034	SF	g	1	748	254	C	T	0.6778	0.6732	0.98	(0.79-1.21)	0.84568
rs548234	chr6	106568034	GELA+MAYO_DLBCL+NCI+SF			7665	3857					1.0471	(0.9835-1.1148)	0.149719	0.235608	29.4279	1.033	0.518829	(0.936 - 1.140)	4.37, p = 0.224	0.314
rs7749323	chr6	138230389	NCI	i	0.99525	6221	2660	G	A	0.0292	0.0298	1	(0.82-1.22)	0.99602
rs7749323	chr6	138230389	GELA	i	0.96223	524	548	G	A	0.0214	0.0287	1.47	(0.83-2.59)	0.18591
rs7749323	chr6	138230389	MAYO_DLBCL	i	0.97734	171	393	G	A	0.0335	0.0394	0.99	(0.47-2.11)	0.98423
rs7749323	chr6	138230389	SF	i	0.95262	748	254	G	A	0.0289	0.0339	1.21	(0.66-2.23)	0.53852
rs7749323	chr6	138230389	GELA+MAYO_DLBCL+NCI+SF			7664	3855					1.0529	(0.8834-1.2550)	0.564526	0.615523	0	1.053	0.564425	(0.884 - 1.253)	1.81, p = 0.614	0
rs12537284	chr7	128717906	NCI	i	0.97591	6221	2660	G	A	0.1296	0.1414	1.12	(1.01-1.23)	0.03263
rs12537284	chr7	128717906	GELA	g	1	525	549	G	A	0.1286	0.1211	0.96	(0.73-1.26)	0.76674
rs12537284	chr7	128717906	MAYO_DLBCL	g	1	172	393	G	A	0.1541	0.1463	1	(0.68-1.47)	0.99487
rs12537284	chr7	128717906	SF	g	1	748	254	G	A	0.137	0.1299	0.94	(0.69-1.27)	0.66616
rs12537284	chr7	128717906	GELA+MAYO_DLBCL+NCI+SF			7666	3856					1.076	(0.9856-1.1747)	0.101683	0.540088	0	1.081	0.0764502	(0.992 - 1.179)	2.19, p = 0.535	0
rs4917014	chr7	50305863	NCI	g	1	6221	2661	T	G	0.3206	0.3082	0.95	(0.89-1.02)	0.18578
rs4917014	chr7	50305863	GELA	g	1	525	549	T	G	0.3448	0.326	0.87	(0.73-1.04)	0.13423
rs4917014	chr7	50305863	MAYO_DLBCL	g	1	172	393	T	G	0.2936	0.313	1.06	(0.80-1.39)	0.69832
rs4917014	chr7	50305863	SF	g	1	748	254	T	G	0.3128	0.3484	1.18	(0.95-1.47)	0.1392
rs4917014	chr7	50305863	GELA+MAYO_DLBCL+NCI+SF			7666	3857					0.964	(0.9053-1.0264)	0.252236	0.17047	40.2175	0.98	0.710395	(0.879 - 1.092)	5.21, p = 0.157	0.424
rs849142	chr7	28185891	NCI	g	1	6221	2661	T	C	0.4964	0.4925	0.98	(0.92-1.05)	0.56378
rs849142	chr7	28185891	GELA	i	0.99616	525	549	T	C	0.4995	0.4816	0.93	(0.78-1.11)	0.42332
rs849142	chr7	28185891	MAYO_DLBCL	i	0.99984	172	392	T	C	0.4215	0.4961	1.33	(1.01-1.75)	0.043281
rs849142	chr7	28185891	SF	i	0.99542	748	254	T	C	0.516	0.4867	0.89	(0.73-1.09)	0.25205
rs849142	chr7	28185891	GELA+MAYO_DLBCL+NCI+SF			7666	3856					0.98	(0.9241-1.0393)	0.500527	0.115763	49.2911	0.988	0.836268	(0.882 - 1.107)	5.97, p = 0.113	0.497
rs6985109	chr8	10761585	NCI	g	1	6221	2661	G	A	0.5359	0.5323	0.97	(0.91-1.04)	0.46172
rs6985109	chr8	10761585	GELA	g	1	525	549	G	A	0.5048	0.4891	0.94	(0.79-1.11)	0.47105
rs6985109	chr8	10761585	MAYO_DLBCL	g	1	172	393	G	A	0.5407	0.5153	0.87	(0.66-1.14)	0.30975
rs6985109	chr8	10761585	SF	g	1	748	254	G	A	0.5361	0.5315	0.97	(0.79-1.19)	0.79276
rs6985109	chr8	10761585	GELA+MAYO_DLBCL+NCI+SF			7666	3857					0.9653	(0.9104-1.0236)	0.238301	0.856453	0	0.962	0.187827	(0.907 - 1.019)	0.66, p = 0.883	0
rs7812879	chr8	11340181	NCI	i	0.96403	6221	2660	T	C	0.8467	0.8465	0.96	(0.87-1.06)	0.39819
rs7812879	chr8	11340181	GELA	g	1	525	549	T	C	0.8324	0.796	0.79	(0.63-0.99)	0.040788
rs7812879	chr8	11340181	MAYO_DLBCL	g	1	172	393	T	C	0.8023	0.8244	1.09	(0.78-1.53)	0.61467
rs7812879	chr8	11340181	SF	i	0.98841	748	254	T	C	0.8343	0.8386	1.02	(0.78-1.34)	0.88282
rs7812879	chr8	11340181	GELA+MAYO_DLBCL+NCI+SF			7666	3856					0.9482	(0.8746-1.0279)	0.196445	0.320344	14.3647	0.945	0.276114	(0.853 - 1.046)	3.50, p = 0.320	0.144
rs7829816	chr8	56849386	NCI	g	1	6221	2661	A	G	0.1958	0.2041	1.03	(0.95-1.12)	0.44036
rs7829816	chr8	56849386	GELA	g	1	525	549	A	G	0.2057	0.2213	1.04	(0.85-1.29)	0.67833
rs7829816	chr8	56849386	MAYO_DLBCL	g	1	172	393	A	G	0.1977	0.1807	0.84	(0.59-1.20)	0.34429
rs7829816	chr8	56849386	SF	g	1	748	254	A	G	0.1892	0.2087	1.14	(0.88-1.48)	0.32605
rs7829816	chr8	56849386	GELA+MAYO_DLBCL+NCI+SF			7666	3857					1.0341	(0.9611-1.1126)	0.369181	0.610166	0	1.031	0.411988	(0.959 - 1.107)	1.86, p = 0.602	0
rs1913517	chr10	50119054	NCI	g	1	6221	2661	A	G	0.4669	0.475	1.02	(0.96-1.09)	0.49449
rs1913517	chr10	50119054	GELA	g	1	525	549	A	G	0.4971	0.52	1.02	(0.86-1.22)	0.80054
rs1913517	chr10	50119054	MAYO_DLBCL	g	1	172	393	A	G	0.4448	0.4873	1.14	(0.87-1.49)	0.35712
rs1913517	chr10	50119054	SF	g	1	748	254	A	G	0.496	0.498	1.01	(0.82-1.23)	0.94095
rs1913517	chr10	50119054	GELA+MAYO_DLBCL+NCI+SF			7666	3857					1.0271	(0.9689-1.0889)	0.368879	0.901361	0	1.024	0.403469	(0.968 - 1.083)	0.65, p = 0.886	0
rs4963128	chr11	589564	NCI	g	1	6221	2661	T	C	0.6674	0.6719	1.02	(0.95-1.10)	0.53493
rs4963128	chr11	589564	GELA	g	1	525	549	T	C	0.6686	0.6667	0.98	(0.82-1.17)	0.81629
rs4963128	chr11	589564	MAYO_DLBCL	g	1	172	393	T	C	0.6657	0.6794	1.04	(0.79-1.38)	0.78401
rs4963128	chr11	589564	SF	i	0.9381	747	253	T	C	0.6726	0.6833	1.05	(0.85-1.31)	0.64326
rs4963128	chr11	589564	GELA+MAYO_DLBCL+NCI+SF			7665	3856					1.0208	(0.9595-1.0861)	0.514213	0.959417		1.018	0.570646	(0.956 - 1.085)	0.28, p = 0.964	0
rs507230	chr11	35129172	NCI	i	0.97975	6220	2660	G	A	0.5174	0.5233	1.01	(0.94-1.08)	0.86413
rs507230	chr11	35129172	GELA	g	1	525	549	G	A	0.5581	0.551	0.97	(0.81-1.15)	0.70771
rs507230	chr11	35129172	MAYO_DLBCL	g	1	172	393	G	A	0.5058	0.5153	0.98	(0.74-1.31)	0.9158
rs507230	chr11	35129172	SF	g	1	748	254	G	A	0.5348	0.5256	0.96	(0.78-1.18)	0.6944
rs507230	chr11	35129172	GELA+MAYO_DLBCL+NCI+SF			7665	3856					0.9965	(0.9388-1.0577)	0.908123	0.955797		1	0.987989	(0.941 - 1.062)	0.36, p = 0.948	0
rs6590330	chr11	128311059	NCI	i	0.99705	6221	2660	G	A	0.1027	0.1064	1.06	(0.95-1.18)	0.33327
rs6590330	chr11	128311059	GELA	g	1	525	549	G	A	0.1057	0.1002	0.92	(0.69-1.23)	0.58032
rs6590330	chr11	128311059	MAYO_DLBCL	g	1	172	393	G	A	0.1163	0.0802	0.73	(0.46-1.16)	0.18061
rs6590330	chr11	128311059	SF	g	1	748	254	G	A	0.1016	0.1024	1.01	(0.72-1.41)	0.9594
rs6590330	chr11	128311059	GELA+MAYO_DLBCL+NCI+SF			7666	3856					1.0197	(0.9256-1.1234)	0.692626	0.410312		1.024	0.631018	(0.931 - 1.126)	2.98, p = 0.395	0
rs1385374	chr12	129300694	NCI	i	0.99867	6220	2661	C	T	0.102	0.1064	1.02	(0.91-1.13)	0.77968
rs1385374	chr12	129300694	GELA	g	1	525	549	C	T	0.1057	0.1002	0.93	(0.70-1.24)	0.63378
rs1385374	chr12	129300694	MAYO_DLBCL	g	1	172	393	C	T	0.1221	0.0992	0.76	(0.49-1.17)	0.21054
rs1385374	chr12	129300694	SF	g	1	748	254	C	T	0.1043	0.1063	1.01	(0.73-1.41)	0.94742
rs1385374	chr12	129300694	GELA+MAYO_DLBCL+NCI+SF			7665	3857					0.9916	(0.9011-1.0911)	0.862195	0.604847	0	0.995	0.918053	(0.905 – 1.094)	1.90, p = 0.594	0
rs16972959	chr16	23901376	NCI	i	0.98011	6220	2661	G	A	0.1951	0.192	0.96	(0.88-1.04)	0.31554
rs16972959	chr16	23901376	GELA	g	1	525	549	G	A	0.1848	0.2095	1.15	(0.92-1.44)	0.21202
rs16972959	chr16	23901376	MAYO_DLBCL	g	1	172	393	G	A	0.2209	0.1972	0.76	(0.55-1.06)	0.11157
rs16972959	chr16	23901376	SF	i	0.90965	747	253	G	A	0.2017	0.2151	1.09	(0.84-1.42)	0.49643
rs16972959	chr16	23901376	GELA+MAYO_DLBCL+NCI+SF			7664	3856					0.9767	(0.9068-1.0520)	0.533919	0.15972	41.9801	0.991	0.897703	(0.870 – 1.130)	5.12, p = 0.163	0.415
rs2280381	chr16	86018633	NCI	i	0.97769	6220	2660	C	T	0.6222	0.6193	0.98	(0.91-1.05)	0.51761
rs2280381	chr16	86018633	GELA	g	1	525	549	C	T	0.6486	0.6521	0.97	(0.81-1.17)	0.7613
rs2280381	chr16	86018633	MAYO_DLBCL	g	1	172	393	C	T	0.593	0.631	1.23	(0.93-1.63)	0.13876
rs2280381	chr16	86018633	SF	i	0.86054	747	253	C	T	0.6245	0.6874	1.38	(1.10-1.73)	0.0053952
rs2280381	chr16	86018633	GELA+MAYO_DLBCL+NCI+SF			7664	3855					1.013	(0.9526-1.0773)	0.679502	0.0164105	70.7867	1.096	0.265341	(0.933 - 1.287)	10.03, p = 0.018	0.701
rs9888739	chr16	31313253	NCI	g	1	6221	2661	C	T	0.1309	0.1317	1.01	(0.91-1.12)	0.85685
rs9888739	chr16	31313253	GELA	g	1	525	549	C	T	0.1638	0.1658	0.95	(0.75-1.20)	0.67853
rs9888739	chr16	31313253	MAYO_DLBCL	g	1	172	393	C	T	0.125	0.1158	0.96	(0.63-1.46)	0.85863
rs9888739	chr16	31313253	SF	g	1	748	254	C	T	0.1344	0.1476	1.12	(0.84-1.51)	0.44527
rs9888739	chr16	31313253	GELA+MAYO_DLBCL+NCI+SF			7666	3857					1.0083	(0.9254-1.0985)	0.850566	0.85334	0	1.008	0.85152	(0.923 - 1.102)	0.79, p = 0.851	0
rs280519	chr19	10472933	NCI	i	0.99125	6221	2660	A	G	0.5117	0.5128	0.99	(0.93-1.06)	0.79495
rs280519	chr19	10472933	GELA	g	1	525	549	A	G	0.521	0.5392	1.06	(0.90-1.26)	0.46429
rs280519	chr19	10472933	MAYO_DLBCL	g	1	172	393	A	G	0.4855	0.5305	1.17	(0.89-1.55)	0.25884
rs280519	chr19	10472933	SF	i	0.95076	747	253	A	G	0.5003	0.5311	1.14	(0.93-1.41)	0.21469
rs280519	chr19	10472933	GELA+MAYO_DLBCL+NCI+SF			7665	3855					1.0186	(0.9606-1.0802)	0.537376	0.386198	1.16659	1.016	0.582604	(0.959 - 1.077)	3.02, p = 0.389	0.006
rs4810485	chr20	44747947	NCI	g	1	6221	2661	T	G	0.7428	0.7215	0.91	(0.84-0.98)	0.015022
rs4810485	chr20	44747947	GELA	i	0.97887	525	548	T	G	0.7294	0.721	0.98	(0.81-1.20)	0.86705
rs4810485	chr20	44747947	MAYO_DLBCL	i	0.98083	172	392	T	G	0.772	0.7374	0.78	(0.58-1.06)	0.10853
rs4810485	chr20	44747947	SF	i	0.97769	747	253	T	G	0.7301	0.7324	1.01	(0.81-1.27)	0.90366
rs4810485	chr20	44747947	GELA+MAYO_DLBCL+NCI+SF			7665	3854					0.9202	(0.8617-0.9827)	0.0130746	0.500003	0	0.919	0.0133556	(0.860 - 0.983)	2.29, p = 0.515	0
rs463426	chr22	21809185	NCI	g	1	6221	2661	T	C	0.6996	0.6986	0.99	(0.92-1.06)	0.6893
rs463426	chr22	21809185	GELA	g	1	525	549	T	C	0.7048	0.7067	1.07	(0.89-1.29)	0.47955
rs463426	chr22	21809185	MAYO_DLBCL	g	1	172	393	T	C	0.7035	0.7099	0.96	(0.71-1.30)	0.80156
rs463426	chr22	21809185	SF	g	1	748	254	T	C	0.7079	0.7638	1.3	(1.05-1.62)	0.018065
rs463426	chr22	21809185	GELA+MAYO_DLBCL+NCI+SF			7666	3857					1.0167	(0.9547-1.0828)	0.604913	0.109477	50.366	1.06	0.349982	(0.938 - 1.197)	5.90, p = 0.117	0.492
